# Supplementary material for: Structural Insights into Common and Host-Specific Receptor-Binding Mechanisms in Algal Picorna-like Viruses
Source: MDPI journal article supplement (doi:10.3390/v14112369), 2022-10-27
Supplement: s1 [file s1]

| Parameter or statistic                              | Full CsfrRNAV      | Empty CsfrRNAV     |
|-----------------------------------------------------|--------------------|--------------------|
| Data collection and processing                      |                    |                    |
| Magnification                                       | 79,000             | 79,000             |
| Voltage (kV)                                        | 300                | 300                |
| Electron exposure (e <sup>-</sup> /Å <sup>2</sup> ) | 30                 | 30                 |
| Defocus range (μm)                                  | -0.10 to -4.00     | -0.10 to -4.00     |
| Pixel size (Å)                                      | 1.1041             | 1.1041             |
| Symmetry imposed                                    | 1                  | 1                  |
| Initial micrographs (No.)                           | 10,310             | 10,310             |
| Final micrographs (No.)                             | 9,947              | 9,772              |
| Initial particle images (No.)                       | 174,942            | 152,127            |
| Final particle images (No.)                         | 3,984              | 1,302              |
| Map resolution (Å)                                  | 3.0                | 3.1                |
| FSC threshold                                       | 0.143              | 0.143              |
| Map resolution range (Å)                            | 2.696 to 3.406     | 2.4 to 3.588       |
| Refinement                                          |                    |                    |
| Map sharpening <i>B</i> factor (Å <sup>2</sup> )    | 91.6               | 82.9               |
| Model composition                                   |                    |                    |
| Non-hydrogen atoms                                  | 6171               | 5689               |
| Protein residues                                    | 785                | 718                |
| <i>B</i> factors (Å <sup>2</sup> )                  |                    |                    |
| Protein (min./max./mean)                            | 17.34/122.72/55.06 | 20.66/131.81/64.13 |
| RMSD*                                               |                    |                    |
| Bond lengths (Å)                                    | 0.003              | 0.005              |
| Bond angles (°)                                     | 0.680              | 0.627              |
| Validation                                          |                    |                    |
| MolProbity score                                    | 2.27               | 1.88               |
| Clashscore                                          | 5.86               | 7.52               |
| Poor rotamers (%)                                   | 3.72               | 0                  |
| Ramachandran plot                                   |                    |                    |
| Favored (%)                                         | 90.99              | 92.39              |
| Allowed (%)                                         | 9.01               | 7.61               |
| Disallowed (%)                                      | 0                  | 0                  |
| CC (mask)                                           | 0.88               | 0.88               |
| EMRinger score                                      | 3.21               | 3.25               |
| Data deposition                                     |                    |                    |
| EMDB                                                | EMD-15823          | EMD-15830          |
| PDB                                                 | 8B38               | 8B3J               |

\*RMSD, root mean square deviation

**Table S1.** Cryo-EM data collection, refinement, and validation statistics.

| Genus             | Species                                              | Virus name                                    | Accession number | Abbreviation | Average pLDDT (%) |     | VP1 sequence used for AlphaFold                                                                                                                                                                                                                                     |
|-------------------|------------------------------------------------------|-----------------------------------------------|------------------|--------------|-------------------|-----|---------------------------------------------------------------------------------------------------------------------------------------------------------------------------------------------------------------------------------------------------------------------|
| Bacillarnavirus   | <i>Chaetoceros socialis formidans RNA virus 1</i>    | Chaetoceros socialis f. radians RNA virus 01  | A8469874         | CsfrRNAV     | N/A               | N/A |                                                                                                                                                                                                                                                                     |
| Bacillarnavirus   | <i>Chaetoceros tenuissimus RNA virus 01</i>          | Chaetoceros tenuissimus RNA virus 01          | A8375474         | CtenRNAV01   | 82                |     | GAQKLTEFVSDVSEVETPSWSDITRADALNPEADLGSFLSRPVQARINWNTSSYLQTSLSNVWSD<br>FLTHPTIVKKLQNSYWSLGSLSHVKLQINGPPYFGKALASYTPYGFSAPTNINSNVYRNNSLARMSQR<br>DHVILDPTCEKGGTIVCPFYPKPLSLDTADLASDGVGRVDIMSFALQNTSADTSTPINISVYAW<br>MEDVRLSGPTTLRSEKIM                                 |
| Bacillarnavirus   | <i>Rhizosolenia setigera RNA virus 01</i>            | Rhizosolenia setigera RNA virus 01            | A8243297         | RsRNAV01     | 80                |     | DVSVNVGFNSEVPTHTTEIKSAFDRPLSDGWSKLELTSFLRRPVRIEYKTWTVGSFLRDDFFPWDAYL<br>NTASIRKKLENYLRLGSLKLQIFNGTQHHYQKGIYATPFGAAQHPFPFGSAPVLDNVQVYSQKPHV<br>LLDPTDNVGGEMLPVFPFHNVYRHHTQSDLLQQLGQ/DLSSFNKLGHSLGDVTPSVRIAFATYMDDD<br>VALSGSTQFS                                     |
| Kusarnavirus      | <i>Astarnavirus</i>                                  | Asterionellopsis glacialis RNA virus          | A8973945         | AglaRNAV     | 90                |     | NSEPLTMSSEAPVEQQITAFADQDAGWKEIHGNYDATMDKVEYTSNDSLGSFLQRPGRSQVT<br>VLINQRLVYKPNPWEFMEFPFIRNKIANEYLVRCKMHCIMVSGTFFHYGRALTSYNPLSGFDQVT<br>VERNYLDQDLYQASQKPHFLNPTKNTGGEICMPFFWEKNYLSLSDKDYENMGELTIKSGNLLHA<br>NNGNDPVTVTYTLWAEDVVLTMPTSLNP                             |
| Labyrnavirus      | <i>Aurantiochytrium single-stranded RNA virus 01</i> | Aurantiochytrium single-stranded RNA virus 01 | A8193726         | ASSRNAV01    | 68                |     | ESKEVGEMSMGGDIHTEHQNVQDHTGEASDRVTGSSIQETGDSGSGTQYLSNFFERPAIYDAT<br>WDGSTEHVNVFEPWDLWSKDTSRKALANYSYKGTMTMHIKATITGPHHTGTIMASYQPYGVYNG<br>NLKYEDEMNMATTGPGPTLPAYKCYLSQAPGAYIDYKKNQCPVLEIPFISHKPKRFLRNNSPDVTN<br>ATSPVDFKEAGELRLVTNLKLAJAVANDFSDVSLNIYAWYTDVLEGNITATDMO |
| Locarnavirus      | <i>Jericarnavirus B</i>                              | Marine RNA virus JP-B                         | EF198242         | JP-B         | 84                |     | QSSDIEMTPESTGNTMQEENVGFGQQDPLTIPNDLSRVQDQSQNVTLGNFLKRPVQIATQTW<br>TVGSTITDGLVDNFDPWHLVFNHAPIRKLDNYLVRCLHLKFPVNVASPPYGTCLASYQLTNFAP<br>GFTPTGTAGCERTATTQRPHWVYQDSGGGEMVLPFLYKXWLDATSAVDLTNMGTLFSQSGFSL<br>ANANGATGDIIEIYYAWAEDIEVAGPTVALV                            |
| Locarnavirus      | <i>Sanfarnavirus 1</i>                               | Marine RNA virus SF-1                         | JN661160         | SF-1         | 90                |     | VQADVIPSVEVTGVTGQQRQTVTFLDTPNDGHAGIERSDISMADQVTMAADLREFFSRPVRIASFTW<br>LESDAGTSHTNPNWLVYDQRYKLNINFAQLAELEIKILYNASPPYQCLAGPLQDLPTSTI<br>TNDGTGTYFIPQSQRPWHLEPTGKSGSLTFFYHKNWLNACQAGMDTMDGQLTFLNHTTLAS<br>ANGVAGSGEVTVSFVASKNVRLSGPSVLAV                              |
| Locarnavirus      | <i>Sanfarnavirus 2</i>                               | Marine RNA virus SF-2                         | KF412901         | SF-2         | 84                |     | VATNLPTTFDNDQVAGVTVSPTDNWAEADVGDANTLADLSGFLQRPVRIHTLWLESDPVGVLG<br>NTIDPWSLFFSNAIAIKKIDINYAFRLATLKKIINSTFPNYGAARVYTPRLWTHGRIPTSNALNLVP<br>QSQLPGAWIPQNSQSGCELSPPYKHENRIALTSDMADMGRLSFLYSALKSANGVTATGVSQIV                                                           |
| Locarnavirus      | <i>Sanfarnavirus 3</i>                               | Marine RNA virus SF-3                         | KF478836         | SF-3         | 86                |     | EKQSDSTPMETSSATNETTQVTSFMDGTTATGTAAAPPSSAPADALTGAELGDLGRPAQIAJF<br>TWSQSDVVGTTTSSYVWQNFNNAIRKLENFAWLRCDLKVMVNASPPYGGAMLATYQPLPN<br>FSPSTIVNDGTGTYFIPLTQRPHAWIPQNGEAMTLPFFWPKNWLSLTSNADFADMTLSLSVFT<br>DLSANGATGSGATFTYAWAENVTLNGPTCGLIM                             |
| Marnavirus        | <i>Heterosigma akashiwo virus</i>                    | Heterosigma akashiwo RNA virus                | AY337486         | HaRNAV       | 76                |     | TCTPHDEKLLTETLCNTLKRYDTSGLRNESHOTMSNGTERRRPGEVDGLASLRPRTVFTDTPKPG<br>TNFYQASNIWKSFLNDOTVDKISHFARLRGKMVRLINLNGNSMYGKLVHMHSYFQADVDVTVSS<br>VPDPAEIQWIMQKPHSFDAITTGATMELPMLPNWDVLDLTDIEDMIARGLTYIHDLNLEHANA<br>GTDELTVTLVAVWMEDEVLYLPTSTSEI                            |
| Salisharnaviruses | <i>Britannavirus 4</i>                               | Marine RNA virus BC-4                         | MH171300         | BC-4         | 89                |     | ADGTTNDSNVKISGAGKYENVCFSDQVDPYAYNVESIMDPTKRLQDGTGATLQNFSPRIKIEQVE<br>WATTSQCLJFDVNPWEAFNGTRVANRLSNFLRLAKLHVKIVINGNGFQYGRALASYLPSIYDTLST<br>NAGLJLRQDLVQASQKPHFLDPTTSQSGEMTLPPYNYWNYSSIPDTQWNELGILQFRSINDLKH<br>GASDVTVTSVFAWAEDEVMVSLVSQDQ                          |
| Salisharnaviruses | <i>Palmarnavirus 473</i>                             | Marine RNA virus PAL473                       | K7727026         | PAL473       | 87                |     | FNNVINTDXTMMSSGNVTFKQDTPSYSVAAANDATFEVADRSDSLGEFFSRPVRIREFQWATT<br>TLFESPNWHTDVTNPNWLNRTNHLRLKCLKPVINGNGFHYGRICISYPLRDDOFTVDRAPIE<br>DIVGASQRPYHLDPPTSSGGTMCLPFWNYNCLVNEEWSKMGTMIMHTMQSLQHANGANDS<br>ATISVFAWAEVDVLAVPTSSERG                                        |
| Sogarnavirus      | <i>Britannavirus 2</i>                               | Marine RNA virus BC-2                         | MG584188         | BC-2         | 86                |     | GTIQEQGVANFSEITDFNEQDAGWTTKCGSGMDATMNLGSSGDSLTGSLGRPTRIADFSWVVDQ<br>PFKEIDPWSLFLNDRVAEKIANEYLRKLNHVMVISGTFHYGRALVSNPYSGYDQITVERNFLQ<br>QDLVAASQKPHFLNPTNTNGQLDLPFFWPNYLSLSSSNRNLGEMFKSFLQHANEENDPV<br>NITYVWASDVELTMPTSLTL                                          |
| Sogarnavirus      | <i>Britannavirus 3</i>                               | Marine RNA virus BC-3                         | MG584189         | BC-3         | 88                |     | EGSAAATEQITAFSDQAGWTTCKGGSDATMNLSSNSDGLGNFLERPIRIHEAPWIMGQPLTTF<br>NPWVDFMSNPVKEIAHYELLRMNLHVKFVISGTFHYGRALVSNPYLFDITQRYLVLDVLQ<br>ASQKPHFLNPTNAGSQKPHFLMDPTTSQGGEMLLPFWPENYLSLSSSNRNLGEMFKSFLQHANEENDPV<br>WASDVLTMPTSLT                                           |
| Sogarnavirus      | <i>Chaetarnavirus 2</i>                              | Chaetoceros species RNA virus 02              | A8639040         | CspRNAV2     | 70                |     | DSNSPSGGAYSVSKAAEQSTQNVHVDGDTPHWSYDISSPDVTTQLAGFSDAELGSFLGRPIKIEKQ<br>WTPESTRLFEVNPWTEFNSADLEKINRYRNLRLRMKMLINGNSFYGRALVSNPYLNDNSV<br>TLNRAFFEQDLVGASQKPHFLMDPTTSQGGEMLLPFWPENYLSLSSSNRNLGEMFKSFLQHANEENDPV<br>HANGGTDPTVTYVFWAEDVLSVPTTVQAQ                        |
| Sogarnavirus      | <i>Chaetenuissarnavirus II</i>                       | Chaetoceros tenuissimus RNA virus type II     | A8971661         | CtenRNAVII   | N/A               | N/A |                                                                                                                                                                                                                                                                     |
| Sogarnavirus      | <i>Jericarnavirus A</i>                              | Marine RNA virus JP-A                         | EF198241         | JP-A         | 92                |     | NSEGDTGFSVSKVDRESAAQNVHVDGDTPWWSYDIKANADETTKLAFTDAELGDLSPRIKIEKQ<br>WTPGVALSAPRPNPWRREFNNSDVLQINRYRNLRLRMKMLVINGNSFYGRALVSNPYLNDNSV<br>VTYVNTFREEDLQASQKPHFLDPTTSQGGEMLLPFWPENYLSLSSSNRNLGEMFKSFLQHANEENDPV<br>QHANGGTDPSITFCWAENLTLAIPTAQVS                        |
| Sogarnavirus      | <i>Palmarnavirus 156</i>                             | Marine RNA virus PAL156                       | K7727024         | PAL156       | 89                |     | GTSQKPTTNLTQETAFSDQAGWTTTGGSDPDTMDLAATVDSQDLGNFLGRPVRIAYNVWQVS<br>GFERFNPWREFINDEVERKEATAHFLYRSLKHVMNVSGTFHYGRALVSNPYLGRDVOYTGQSF<br>LQSDLVAAASQKPHFIMPTTNAGGQLDLPFFYDNYLSLRTGDAQEMGEITKSFDSLHANGGTGN<br>VTYVYVWASDVLVAMPSTSVNLL                                    |

**Table S2.** Related *Marnaviridae* virus species used for AlphaFold2 and the average pLDDT scores.

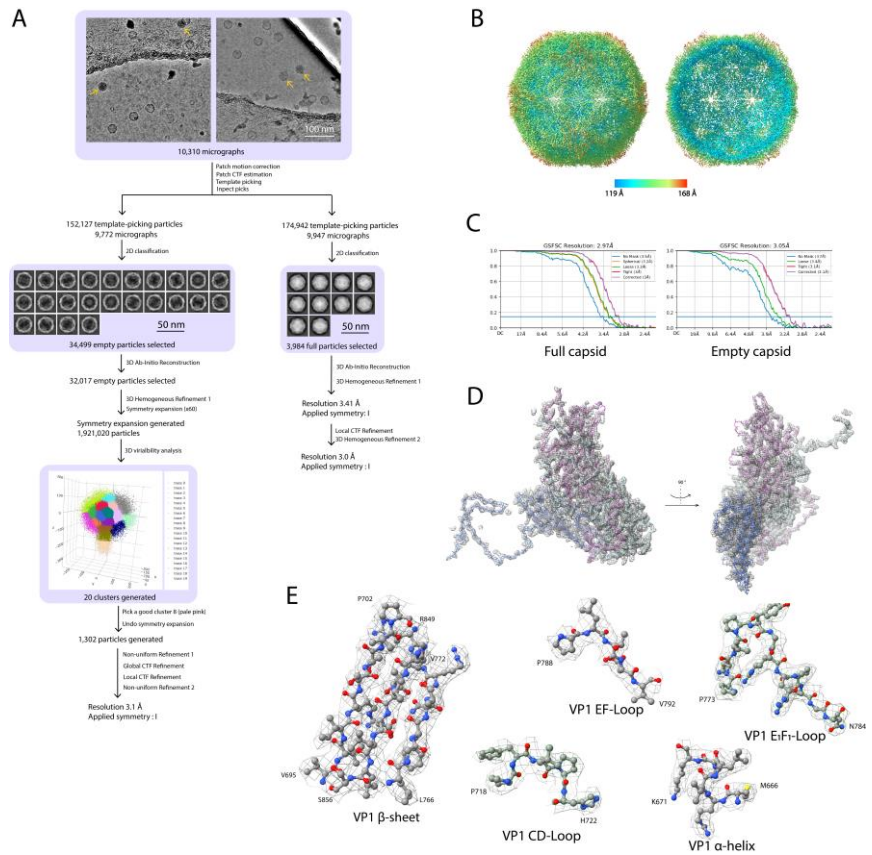

**Figure S1.** Summary of the cryo-EM data analysis. A) Flowchart of the CsfrRNAV capsid data analyses of the cryo-EM micrographs using cryoSPARC. Yellow arrows point out full CsfrRNAV particles in the cryo-EM micrographs. B) Overall 3D reconstruction of the full CsfrRNAV capsid. Left: The overall capsid map. Right: The back half of the capsid shows the interior features. Capsid is colored from blue to red according to its calculated radius. C) The gold standard FSC resolution curves of both full and empty particles in icosahedral (I) symmetry. The resolutions of these cryo-EM models are estimated as 3.0 (full) and 3.1 (empty) Å (FSC cutoff = 0.143). D) The cryo-EM map and the backbone fitting with the atomic models of the capsid VP1 (pink), VP2 (blue), and VP3 (light green). E) Representative  $\beta$ -sheet, loops and  $\alpha$ -helix show the refined side chains in full capsid of CsfrRNAV.

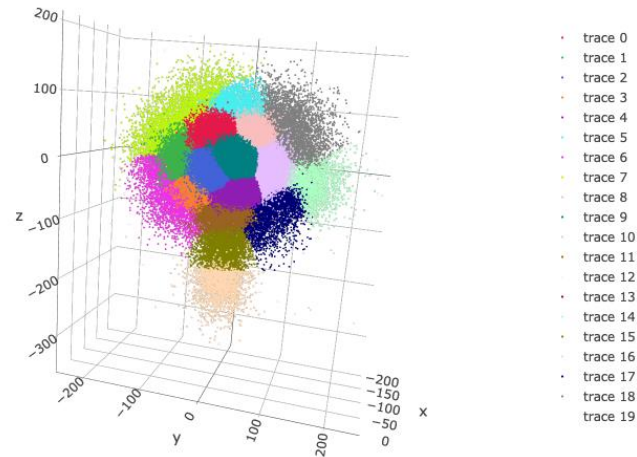

**Figure S2.** 3D variability display. The 3D variability display performed in cryoSPARC 3.3.2. The symmetry expanded empty particles are sorted into 20 clusters in total. Only the map in cluster 8 (pale pink) shows clear secondary structure and therefore is used for further 3D refinement.

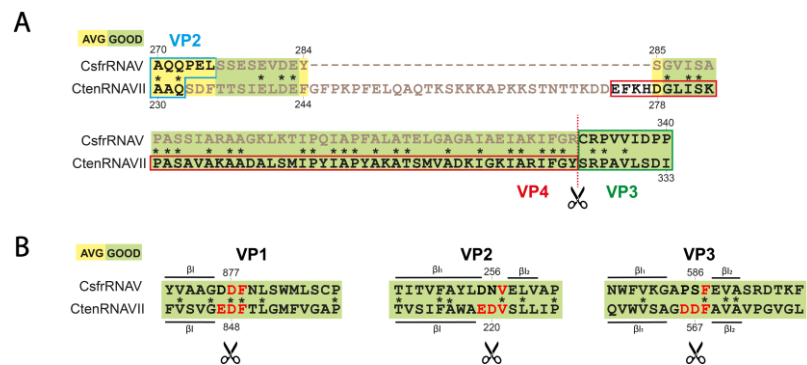

**Figure S3.** Self-cleavage sites and partial sequence alignments of CsfrrNAV and CtenRNAVII. AVG: average sequence identities. GOOD: good sequence identities. \* Identical residues. A) Partial sequence alignment result and the putative VP4 VP3 proteolytic site in CsfrrNAV and CtenRNAVII. Blue, green, and red boxes represent parts of VP2, VP3, and VP4, respectively. Red dashed line represents the proteolytic site between VP4 and VP3. Modeled residues are in black. Unmodeled residues are in gray. B) Putative self-cleavage sites in the VP1, VP2, and VP3 of CsfrrNAV and CtenRNAVII. Residues that are potentially involved in self-cleavage in each VP are colored red. Sequences are aligned using the T-COFFEE (version 11.00) server [59].

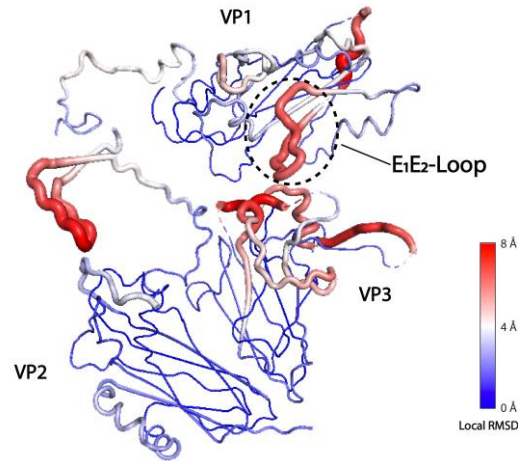

**Figure S4.** RMSD per residue for VP1–3 (CsfrRNAV vs CtenRNAVII). Residues are highlighted from blue to red, showing low to high RMSD values. VP2 does not show apparent structural differences apart from the N-terminal arm. VP3 shows some structural differences in the surface loops adjacent to the VP1 E<sub>1</sub>E<sub>2</sub>-Loop.

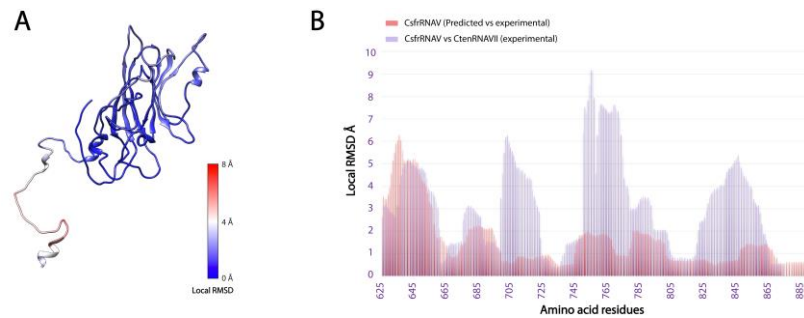

**Figure S5.** AlphaFold2 structural prediction error (predicted vs. experimental) and VP1 structural differences between two representative *Marnaviridae* viruses (CsfrRNAV vs. CtenRNAVII). A) The structural prediction error per residue between the experimental and predicted CsfrRNAV VP1s. The residues are colored from low to high deviations (blue to red) by the attribute of their local RMSD. B) The overall comparison between experimental CsfrRNAV VP1 and CtenRNAVII VP1 structural differences (purple) and the AlphaFold2 prediction errors (red), which were calculated using CsfrRNAV VP1 atomic model as a reference.

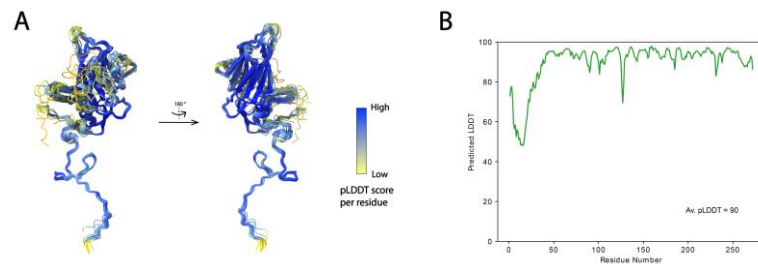

**Figure S6.** Superimposition of the predicted *Marnaviridae* viruses VP1s and the representative residue pLDDT score plot. A) Superimposition of VP1s from all 16 predicted *Marnaviridae* viruses. All models are colored according to their pLDDT scores by residue from yellow (backbone modeled well) to blue (high accuracy).

B) Predicted VP1 model of a locarnavirus (JN661160) is shown as an example plot of pLDDT score per residue.
